# Supplementary material
Source: PubMed Central journal article supplement (PMC3078461)

PTP1B<sup>-/-</sup> hepatocytes

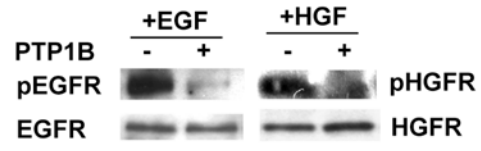

Supplementary1

Supplement: mmc1.pdf [file mmc1.pdf]

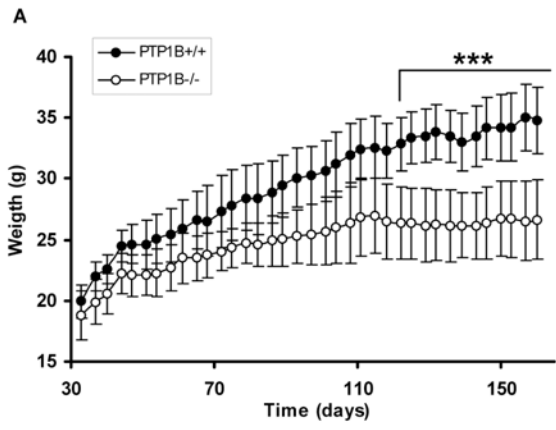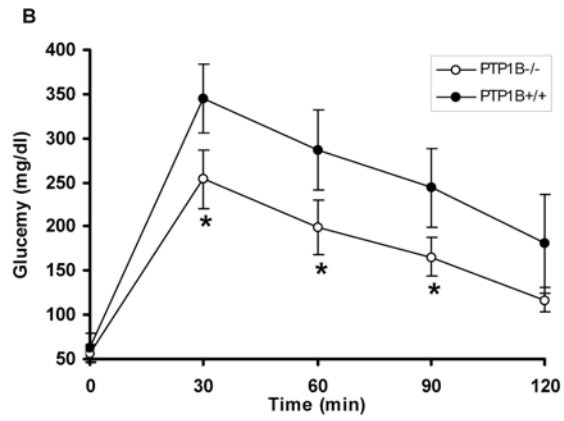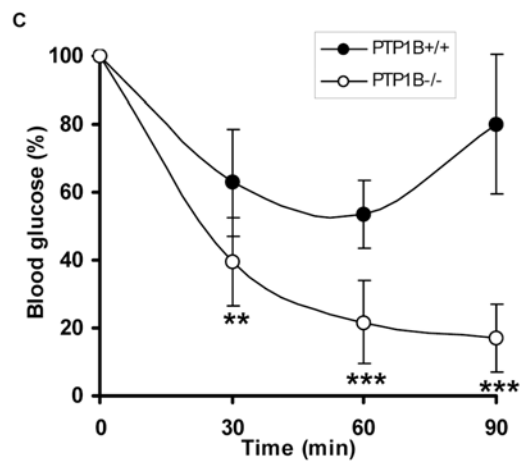

Supplementary2

Supplement: mmc2.pdf [file mmc2.pdf]
